# Supplementary material for: Glacier inventories reveal an acceleration of Heard Island glacier loss over recent decades
Source: Copernicus journal article supplement (doi:10.5194/tc-19-2677-2025), 2025-07-28
Supplement: Supplementary file 1 [file tc-19-2677-2025-supplement.zip]

*Supplement of*

## **Glacier inventories reveal an acceleration of Heard Island glacier loss over recent decades**

Levan G. Tielidze et al.

Correspondence to: Levan G. Tielidze (tielidzelevan@gmail.com)

**Stephenson Glacier satellite images (Landsat\_7\_ETM+), Heard Island**

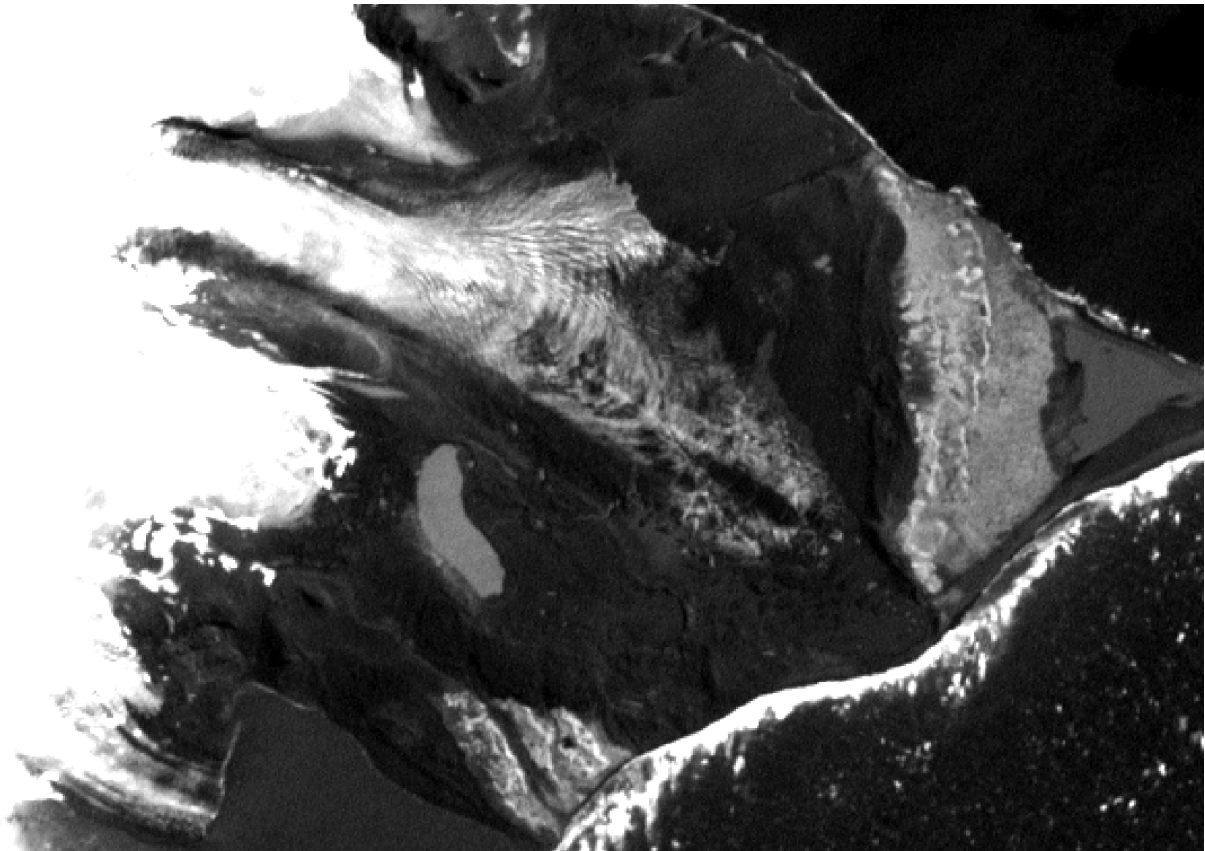

LE07\_L2SR\_135097\_20010131\_20200917\_02\_T1

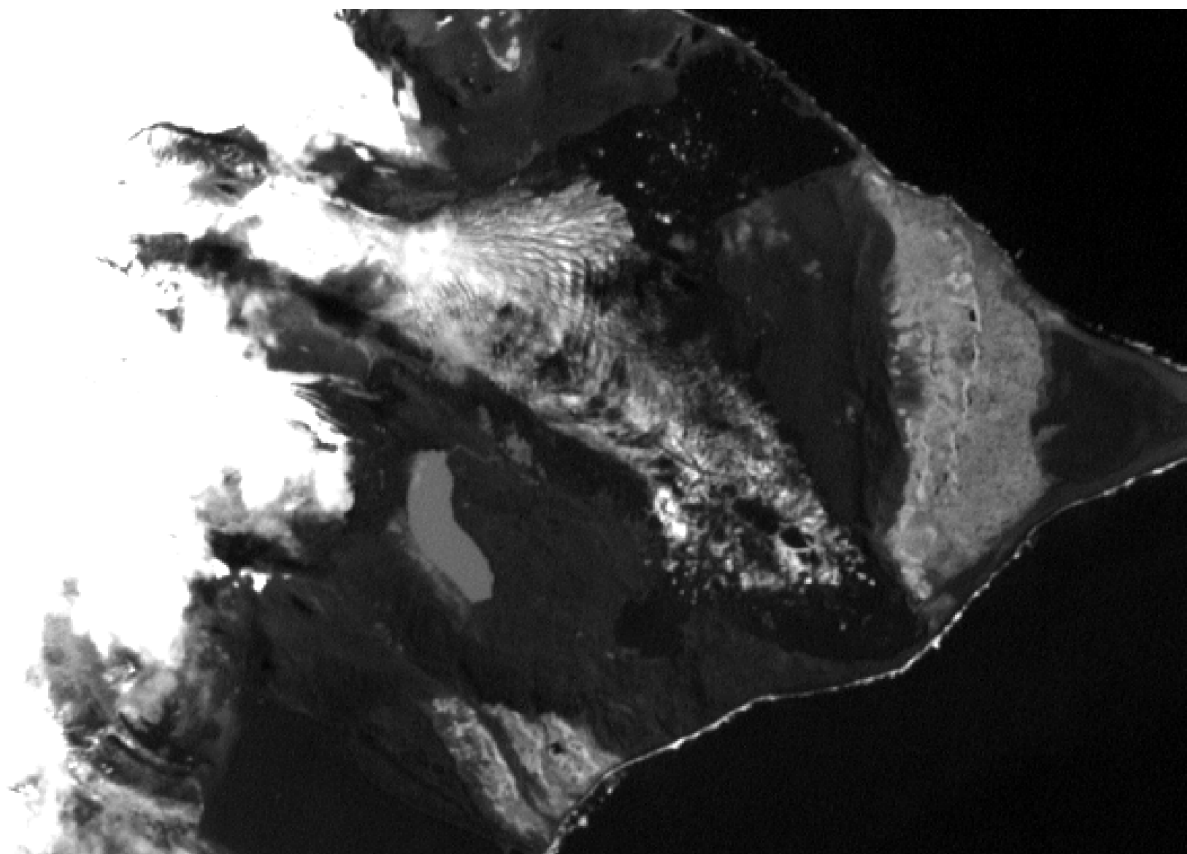

LE07\_L2SR\_135097\_20030105\_20200916\_02\_T1

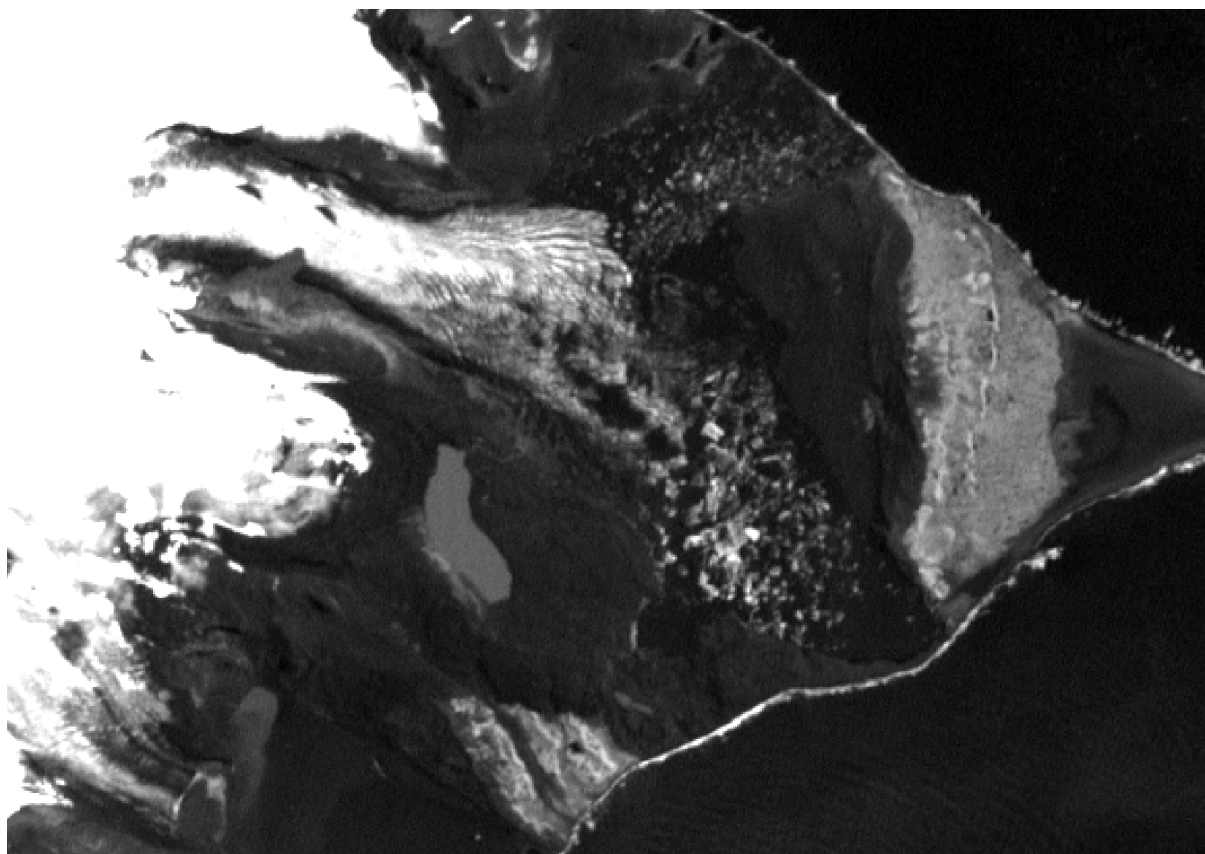

LE07\_L2SR\_135097\_20050126\_20200914\_02\_T1

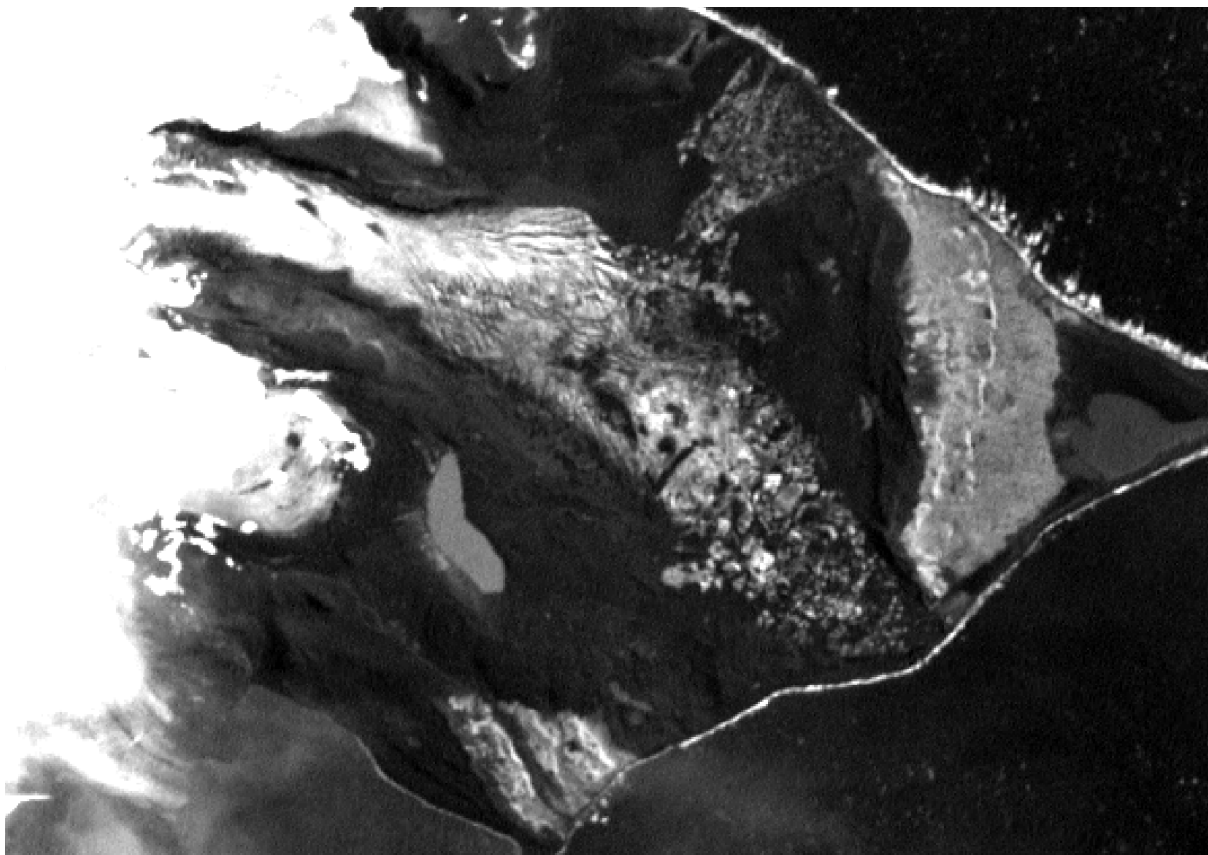

LE07\_L2SR\_135097\_20060214\_20200914\_02\_T1

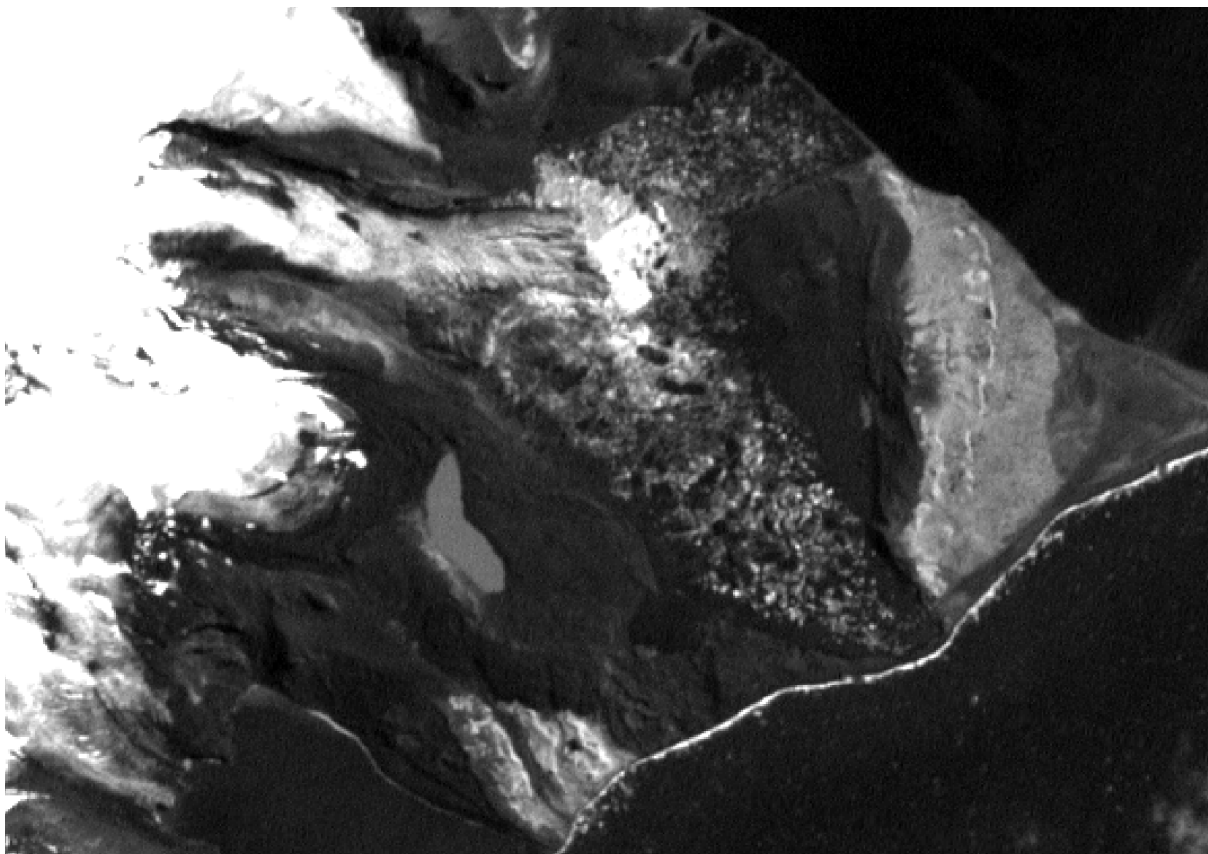

LE07\_L2SR\_135097\_20070217\_20200913\_02\_T1

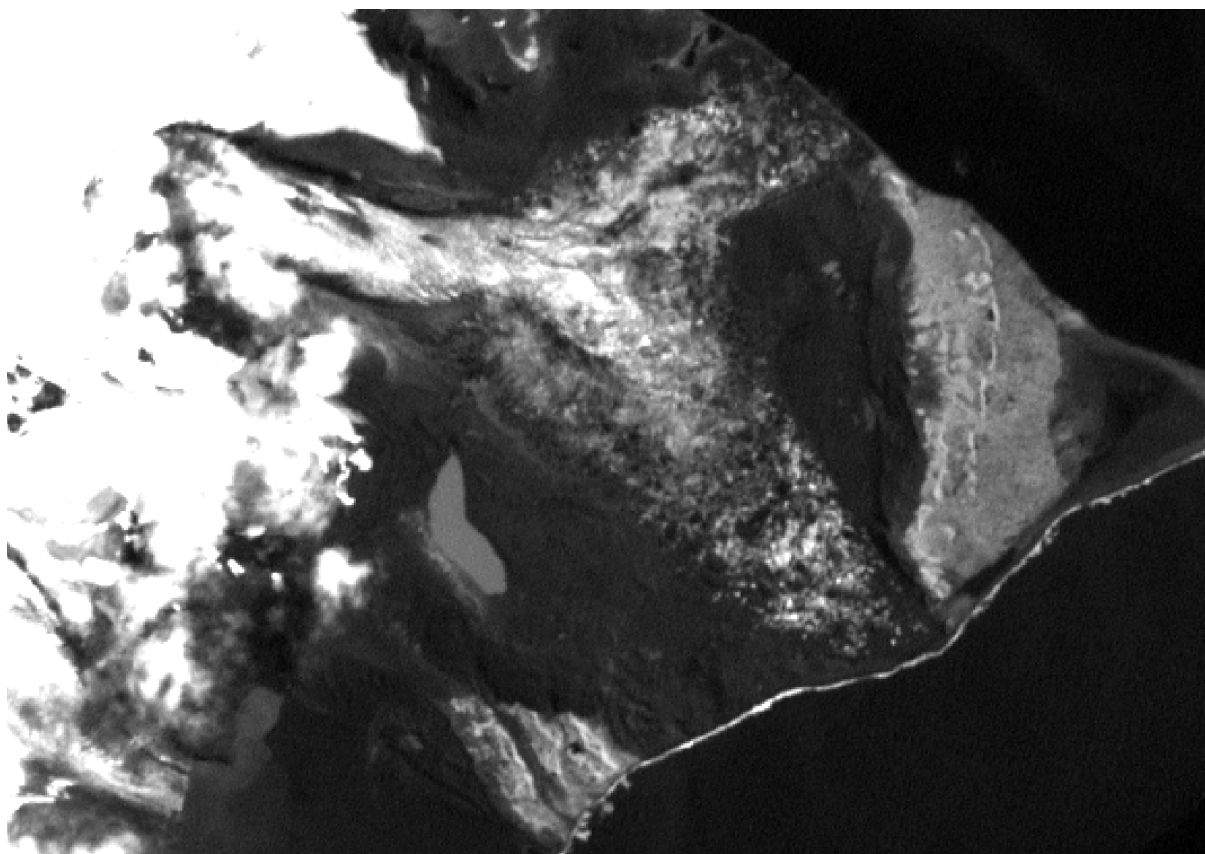

LE07\_L2SR\_135097\_20080204\_20200913\_02\_T1

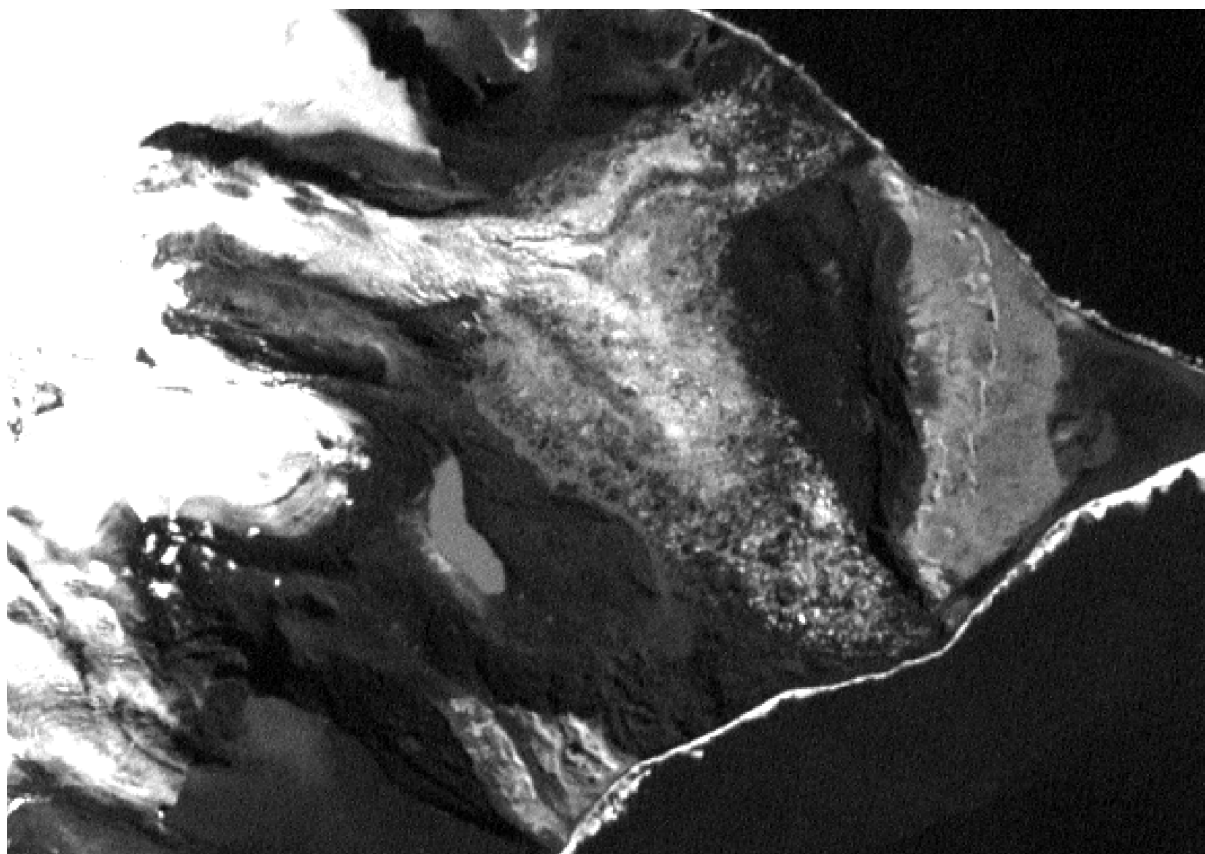

LE07\_L2SR\_135097\_20080323\_20200913\_02\_T1

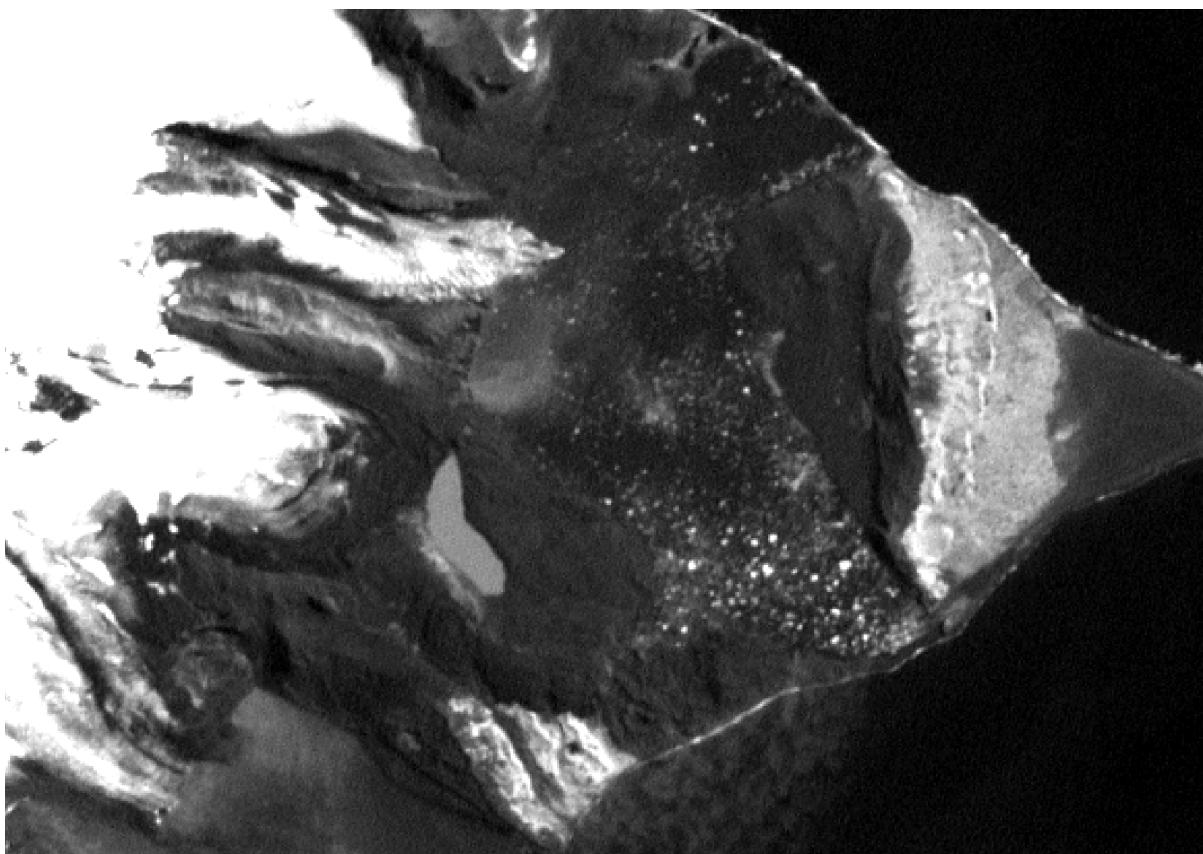

LE07\_L2SR\_135097\_20090206\_20200912\_02\_T1

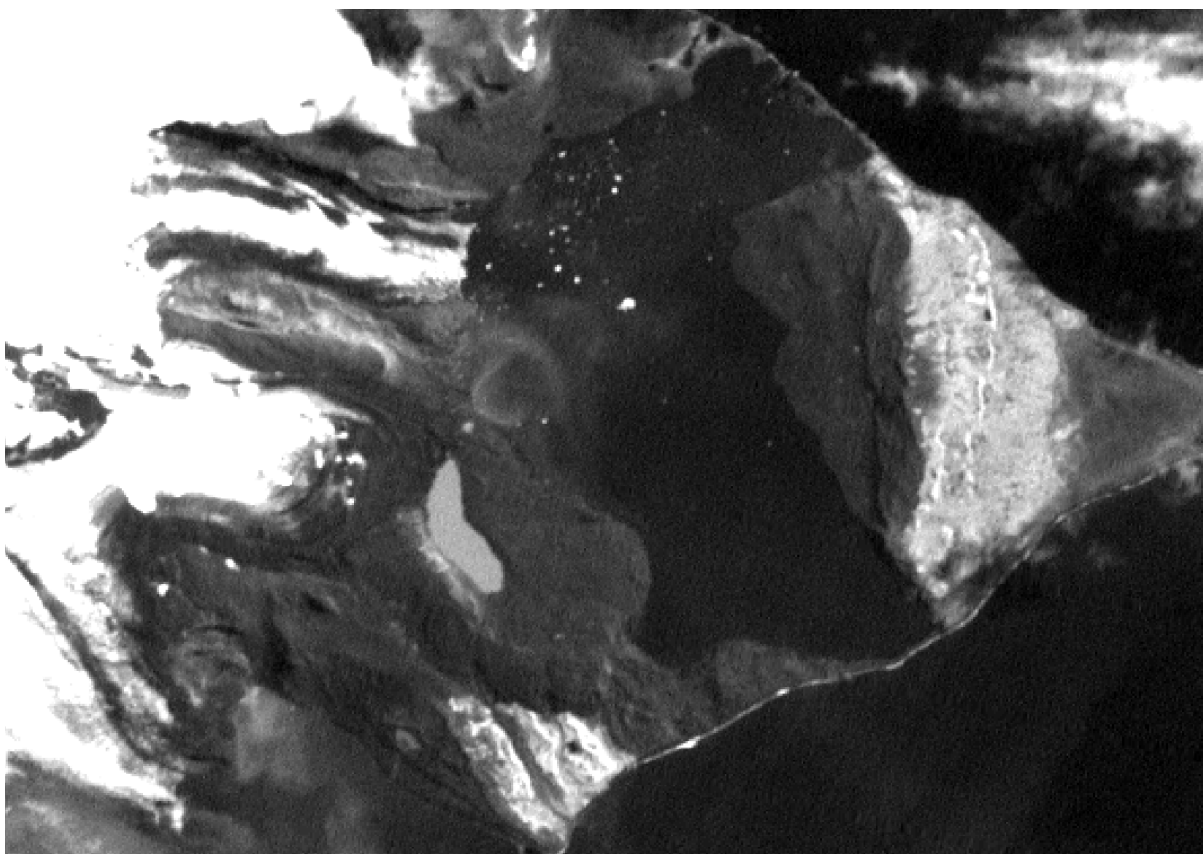

LE07\_L2SR\_135097\_20100209\_20200911\_02\_T1
