# Supplementary material for: Glacier inventories reveal an acceleration of Heard Island glacier loss over recent decades
Source: Copernicus journal article supplement (doi:10.5194/tc-19-2677-2025), 2025-07-28
Supplement: Supplementary file 2 [file tc-19-2677-2025-supplement.zip]

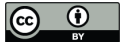

*Supplement of*

**Glacier inventories reveal an acceleration of Heard Island glacier loss over recent decades**

**Levan G. Tielidze et al.**

*Correspondence to:* Levan G. Tielidze ([tielidzelevan@gmail.com](mailto:tielidzelevan@gmail.com))

- [tc-19-2677-2025-supplement-title-page.pdf](#)
- Supplement
  - [Stephenson Glacier\\_Landsat 7.pdf](#)
  - [Stephenson.GIF.gif](#)

The copyright of individual parts of the supplement might differ from the article licence.
